# Supplementary material
Source: publisher site journal article supplement (https://www.dovepress.com/article/503177)
Supplement: Supplementary file 1 [file get_supplementary_file.php]

*Supplemental Table 1: ICD-10-CM codes for Glaucoma*

| Glaucoma | H40.10x, H40.11x, H40.12x, H40.13x, H40.14x, H40.15x, H40.20x, H40.21x, H40.22x, H40.23x, H40.24x, |
| --- | --- |
